# Supplementary material
Source: Springer Nature journal article supplement (https://www.springermedizin.de/resource/supplementary/12876_2012_796_MOESM4_ESM.pdf/9437516)
Supplement: MOESM4 [file 9437516]

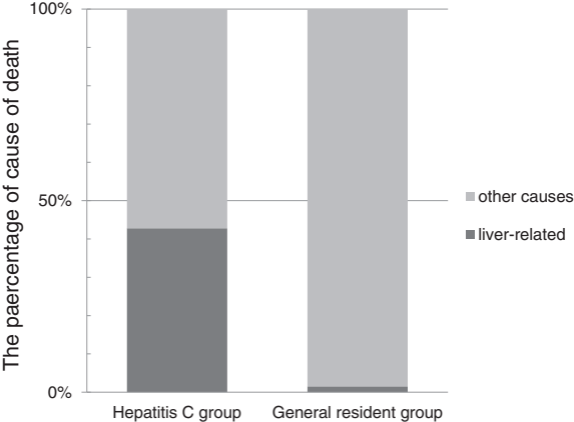

The percentage of cause of death

100%  
50%  
0%

Hepatitis C group

General resident group

other causes  
liver-related
